# Supplementary material for: Characterisation of mouse epididymosomes reveals a complex profile of microRNAs and a potential mechanism for modification of the sperm epigenome
Source: PubMed Central journal article supplement (PMC4994100; doi:10.1038/srep31794), 2016-08-23
Supplement: srep31794-s1.pdf [file srep31794-s1.pdf]

**Manuscript Title:** Characterisation of mouse epididymosomes reveals a complex profile of microRNAs and a potential mechanism for modification of the sperm epigenome

**Authors:** Jackson N. Reilly, Eileen A. McLaughlin, Simone J. Stanger, Amanda L. Anderson, Kate Hutcheon, Kiralee Church, Bettina P. Mihalas, Sonika Tyagi, Janet E. Holt, Andrew L. Eamens, Brett Nixon

### **SUPPLEMENTARY INFORMATION FILES**

**Supplementary Figure S1:** Assessment of the specificity of epididymosome binding to aldehyde/sulphate latex beads

**Supplementary Figure S2:** Identification of the presence of consensus exomotifs among epididymosome miRNAs

**Table S1:** Normalised abundance reads of miRNAs identified by next generation sequencing within mouse epididymosomes

**Table S2:** Fold changes of epididymosome miRNA abundance between epididymal segments

**Table S3:** Comparison of miRNAs identified in mouse epididymal spermatozoa, epithelial cells and epididymosomes

**Table S4:** Comparison of mouse epididymal miRNA profile reported by Nixon et al., 2015a,b and Reilly et al., 2016 versus Sharma et al., 2016

**Table S5:** Comparison of miRNAs identified in the epididymosomes of mice, humans and bulls

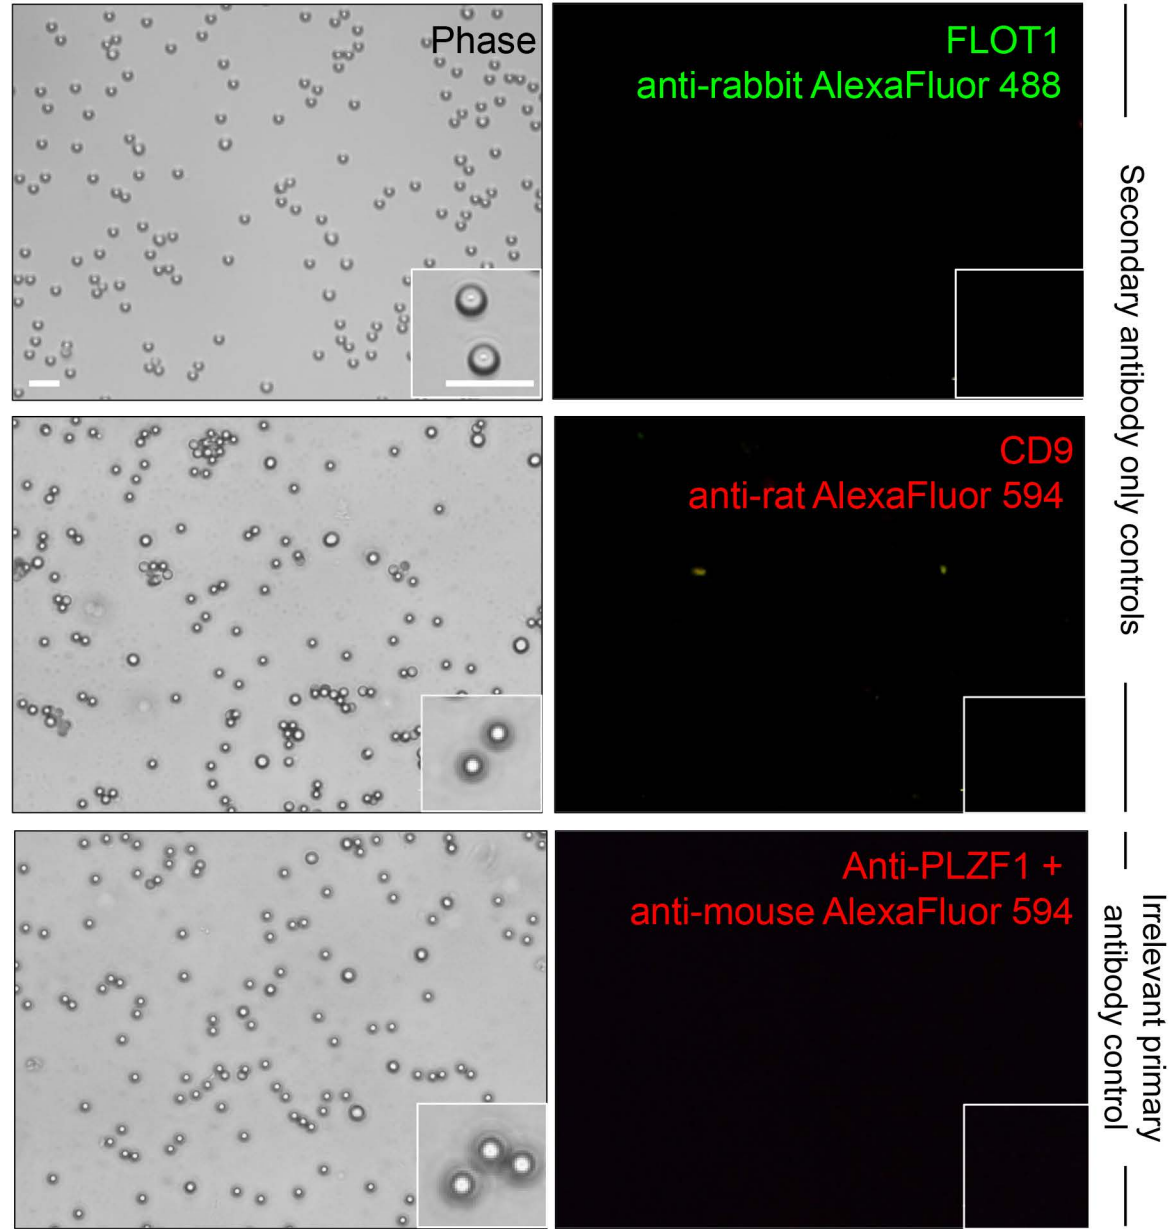

**Supplementary Figure S1: Assessment of the specificity of epididymosome binding to aldehyde/sulphate latex beads.** Epididymosomes were visualised via binding to 4  $\mu\text{m}$  aldehyde/sulphate latex beads and fluorescent labelling of the recognised extracellular vesicle surface markers, CD9 and FLOT1 (see Fig. 1d). The specificity of labelling was established by incubation of epididymosome bound beads with either anti-rabbit AlexaFluor 488 alone (secondary antibody control for FLOT1), anti-rat AlexaFluor 594 alone (secondary antibody control for CD9), or a combination of anti-PLZF1 (irrelevant primary antibody control) and anti-mouse AlexaFluor 594.

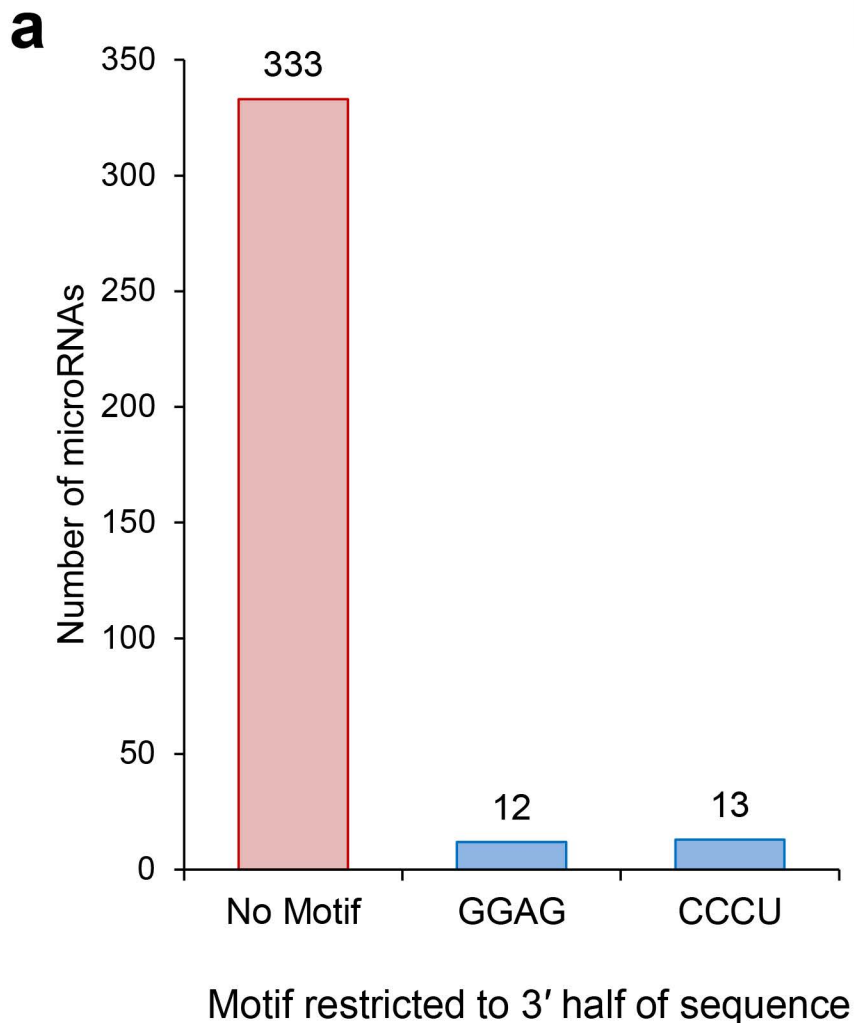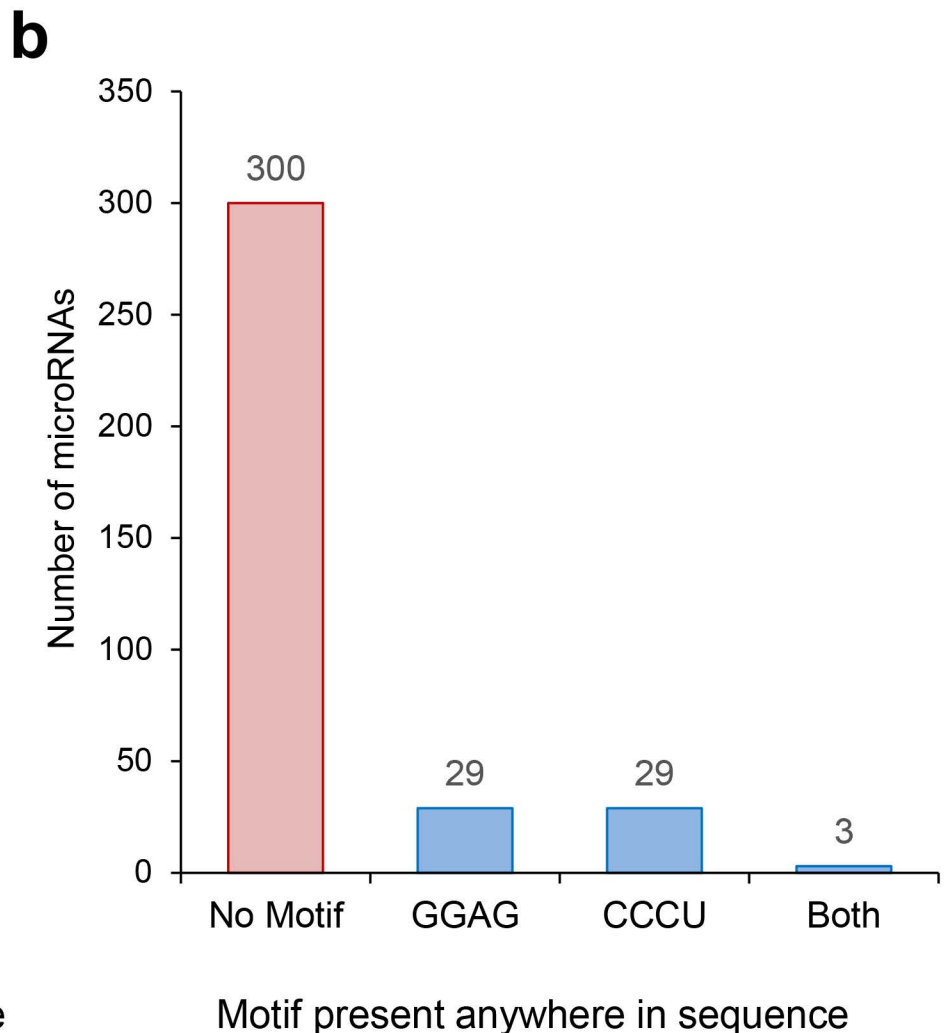

**Supplementary Figure S2: Identification of the presence of consensus exomotifs among epididymosome miRNAs.** The list of 358 unique miRNAs identified in this study were screened for the presence of the consensus exomotifs 'GGAG' and 'CCCU' reported by Villarroya-Beltri et al.<sup>37</sup> as playing a key role in the sorting of miRNAs into exosomes. (a) This analysis revealed that only 7% (25/358) of the miRNAs possessed either exomotif in the 3' half of their sequence. (b) Upon relaxation of the criterion for the exomotif to reside in the 3' half of the miRNA sequence, the number of miRNAs possessing either motif extended to 17% (61/358).

Table S1 : Normalised abundance reads of miRNAs identified by next generation sequencing within mouse epididymosomes

Table with 13 columns: miRNA Family (mmu), Mature miRNA, Caput (Replicate 1, 2, 3), Corpus (Replicate 1, 2, 3), Cauda (Replicate 1, 2, 3), and Average Normalised Reads (Caput, Corpus, Cauda). Rows list miRNAs from let-7 to miR-148.

Total miRNAs identified in mouse epididymosomes = 358















|                 |                    |          |          |          |              |              |              |             |             |             |
|-----------------|--------------------|----------|----------|----------|--------------|--------------|--------------|-------------|-------------|-------------|
|                 | <i>miR-3473e</i>   | 35.84598 | 198.1117 | 150.2287 | 2.066152859  | -0.440317669 | 1.496756692  | 0.028180986 | 0.578160026 | 0.037893554 |
|                 | <i>miR-3473f</i>   | 4.635255 | 33.71874 | 22.71387 | 2.360265643  | -0.221326702 | 1.947355624  | 0.146734161 | 0.895155059 | 0.124901375 |
| <i>miR-3535</i> | <i>miR-3535</i>    | 28.98144 | 349.291  | 66.84868 | 2.740884499  | -2.231954215 | 0.374767821  | 0.009651841 | 0.013093356 | 0.597324188 |
| <i>miR-5099</i> | <i>miR-5099</i>    | 143.0932 | 98.4456  | 161.5296 | -0.826398245 | 0.395656329  | -0.552132718 | 0.100224923 | 0.542800189 | 0.256825235 |
| <i>miR-5100</i> | <i>miR-5100</i>    | 11.93236 | 8.339649 | 40.67933 | 0.075924667  | 1.521306572  | 1.475885424  | 0.973345036 | 0.32041671  | 0.199262978 |
| <i>miR-5119</i> | <i>miR-5119</i>    | 1.957666 | 1.360474 | 26.07558 | -0.091209467 | 2.758751252  | 2.557904693  | 0.973345036 | 0.232503943 | 0.120856706 |
| <i>miR-5121</i> | <i>miR-5121</i>    | 37.10512 | 192.5418 | 444.534  | 2.007342541  | 0.880560582  | 2.775082265  | 0.003635076 | 0.156392554 | 0.000256703 |
| <i>miR-5126</i> | <i>miR-5126</i>    | 12.46791 | 10.74857 | 6.082526 | -0.261478224 | -0.654504419 | -1.055419228 | 0.900566621 | 0.637978879 | 0.317586175 |
| <i>miR-5128</i> | <i>miR-5128</i>    | 4.607789 | 18.58744 | 13.75491 | 1.657146721  | -0.474383907 | 1.052286568  | 0.059245804 | 0.55389649  | 0.118316853 |
| <i>miR-5621</i> | <i>miR-5621-5p</i> | 3.393188 | 26.97842 | 8.131531 | 1.776804752  | -1.23645036  | 0.341302224  | 0.397269715 | 0.564379148 | 0.85478239  |
| <i>miR-6238</i> | <i>miR-6238</i>    | 6.439843 | 68.59899 | 108.9833 | 2.872209478  | -0.085780454 | 2.655930352  | 0.002875447 | 0.940022491 | 0.013255487 |
| <i>miR-6240</i> | <i>miR-6240</i>    | 4120.893 | 3236.247 | 1528.887 | -0.352840672 | -1.209176477 | -1.637448131 | 0.877236949 | 0.449030635 | 0.176684376 |
| <i>miR-6412</i> | <i>miR-6412</i>    | 0.770444 | 4.151088 | 14.67231 | 2.531250418  | 1.112858085  | 3.439711994  | 0.061030138 | 0.452200482 | 0.022574041 |
| <i>miR-6538</i> | <i>miR-6538</i>    | 26.17419 | 29.68917 | 11.64147 | 0.231428507  | -1.071497142 | -0.961845849 | 0.925309054 | 0.524496478 | 0.467775709 |
| <i>miR-6937</i> | <i>miR-6937-5p</i> | 17.28693 | 11.72446 | 28.12969 | -1.112950805 | 1.582142177  | 0.207510628  | 0.516540828 | 0.399004793 | 0.875877556 |
| <i>miR-7033</i> | <i>miR-7033-5p</i> | 24.64218 | 389.7688 | 61.82609 | 3.446815876  | -2.696377083 | 0.613102857  | 0.008185607 | 0.024798604 | 0.530653892 |
| <i>miR-7087</i> | <i>miR-7087-3p</i> | 0.040285 | 0.261091 | 12.3902  | 0            | 4.554384766  | 5.600440643  | 0           | 0.084301339 | 0.022574041 |







|                 |                     |   |   |   |   |   |   |   |   |   |   |   |   |   |
|-----------------|---------------------|---|---|---|---|---|---|---|---|---|---|---|---|---|
| <i>mir-434</i>  | <i>mir-434-5p</i>   | - | - | * | - | - | - | - | - | - | - | + | + | * |
| <i>mir-450</i>  | <i>mir-450b-5p</i>  | - | - | * | - | - | - | - | - | - | - | + | - | - |
| <i>mir-451</i>  | <i>mir-451a</i>     | - | - | * | - | - | - | - | - | - | - | + | + | * |
| <i>mir-455</i>  | <i>mir-455-3p</i>   | - | - | * | - | - | - | - | - | - | - | + | + | * |
| <i>mir-466</i>  | <i>mir-466i-5p</i>  | - | - | * | - | - | - | - | - | - | - | - | + | * |
| <i>mir-467</i>  | <i>mir-467a-3p</i>  | - | - | * | - | - | - | - | - | - | - | + | - | - |
| <i>mir-486</i>  | <i>mir-486a-3p</i>  | - | - | * | - | - | - | - | - | - | - | + | - | * |
|                 | <i>mir-486a-5p</i>  | - | - | * | - | - | - | - | - | - | - | + | + | * |
|                 | <i>mir-486b-5p</i>  | - | - | * | - | - | - | - | - | - | - | + | + | * |
| <i>mir-496</i>  | <i>mir-496a-3p</i>  | - | - | * | - | - | - | - | - | - | - | - | - | * |
| <i>mir-497</i>  | <i>mir-497a-5p</i>  | - | - | * | - | - | - | - | - | - | - | + | + | * |
| <i>mir-542</i>  | <i>mir-542-3p</i>   | - | - | * | - | - | - | - | - | - | - | + | + | * |
| <i>mir-664</i>  | <i>mir-664-3p</i>   | - | - | * | - | - | - | - | - | - | - | + | + | * |
| <i>mir-677</i>  | <i>mir-677-3p</i>   | - | - | * | - | - | - | - | - | - | - | - | + | * |
|                 | <i>mir-677-5p</i>   | - | - | * | - | - | - | - | - | - | - | + | + | * |
| <i>mir-690</i>  | <i>mir-690</i>      | - | - | * | - | - | - | - | - | - | - | + | + | * |
| <i>mir-708</i>  | <i>mir-708-3p</i>   | - | - | * | - | - | - | - | - | - | - | - | + | * |
|                 | <i>mir-708-5p</i>   | - | - | * | - | - | - | - | - | - | - | - | + | * |
| <i>mir-709</i>  | <i>mir-709</i>      | - | - | * | - | - | - | - | - | - | - | - | + | * |
| <i>mir-714</i>  | <i>mir-714</i>      | - | - | * | - | - | - | - | - | - | - | - | + | * |
| <i>mir-879</i>  | <i>mir-879-5p</i>   | - | - | * | - | - | - | - | - | - | - | + | - | - |
| <i>mir-1195</i> | <i>mir-1195</i>     | - | - | * | - | - | - | - | - | - | - | + | + | * |
| <i>mir-1247</i> | <i>mir-1247-5p</i>  | - | - | * | - | - | - | - | - | - | - | + | + | * |
| <i>mir-1291</i> | <i>mir-1291</i>     | - | - | * | - | - | - | - | - | - | - | - | - | * |
| <i>mir-1839</i> | <i>mir-1839-3p</i>  | - | - | * | - | - | - | - | - | - | - | + | + | * |
| <i>mir-1843</i> | <i>mir-1843b-5p</i> | - | - | * | - | - | - | - | - | - | - | + | + | * |
|                 | <i>mir-1843b-3p</i> | - | - | * | - | - | - | - | - | - | - | + | - | - |
| <i>mir-1957</i> | <i>mir-1957a</i>    | - | - | * | - | - | - | - | - | - | - | + | + | * |
| <i>mir-1981</i> | <i>mir-1981-3p</i>  | - | - | * | - | - | - | - | - | - | - | - | + | * |
|                 | <i>mir-1981-5p</i>  | - | - | * | - | - | - | - | - | - | - | - | + | * |
| <i>mir-3470</i> | <i>mir-3470a</i>    | - | - | * | - | - | - | - | - | - | - | + | + | * |
|                 | <i>mir-3470b</i>    | - | - | * | - | - | - | - | - | - | - | + | + | * |
| <i>mir-3473</i> | <i>mir-3473a</i>    | - | - | * | - | - | - | - | - | - | - | + | + | * |
|                 | <i>mir-3473c</i>    | - | - | * | - | - | - | - | - | - | - | + | + | * |
|                 | <i>mir-3473f</i>    | - | - | * | - | - | - | - | - | - | - | - | + | * |
| <i>mir-3535</i> | <i>mir-3535</i>     | - | - | * | - | - | - | - | - | - | - | + | + | * |
| <i>mir-5099</i> | <i>mir-5099</i>     | - | - | * | - | - | - | - | - | - | - | + | + | * |
| <i>mir-5100</i> | <i>mir-5100</i>     | - | - | * | - | - | - | - | - | - | - | + | - | * |
| <i>mir-5119</i> | <i>mir-5119</i>     | - | - | * | - | - | - | - | - | - | - | - | - | * |
| <i>mir-5121</i> | <i>mir-5121</i>     | - | - | * | - | - | - | - | - | - | - | + | + | * |
| <i>mir-5126</i> | <i>mir-5126</i>     | - | - | * | - | - | - | - | - | - | - | + | + | * |
| <i>mir-5128</i> | <i>mir-5128</i>     | - | - | * | - | - | - | - | - | - | - | - | + | * |
| <i>mir-5621</i> | <i>mir-5621-5p</i>  | - | - | * | - | - | - | - | - | - | - | - | + | * |
| <i>mir-6238</i> | <i>mir-6238</i>     | - | - | * | - | - | - | - | - | - | - | - | + | * |
| <i>mir-6240</i> | <i>mir-6240</i>     | - | - | * | - | - | - | - | - | - | - | + | + | * |
| <i>mir-6412</i> | <i>mir-6412</i>     | - | - | * | - | - | - | - | - | - | - | - | - | * |
| <i>mir-6538</i> | <i>mir-6538</i>     | - | - | * | - | - | - | - | - | - | - | + | + | * |
| <i>mir-6937</i> | <i>mir-6937-5p</i>  | - | - | * | - | - | - | - | - | - | - | + | + | * |
| <i>mir-7033</i> | <i>mir-7033-5p</i>  | - | - | * | - | - | - | - | - | - | - | + | + | * |
| <i>mir-7087</i> | <i>mir-7087-3p</i>  | - | - | * | - | - | - | - | - | - | - | - | - | * |

<sup>1</sup> Nixon, B., Stanger, S. J., Mihalas, B. P., Reilly, J. N., Anderson, A. L., Dun, M. D., Tyagi, S., Holt, J. E., and McLaughlin, E. A. (2015) Next Generation Sequencing Analysis Reveals Segmental Patterns of microRNA Expression in Mouse Epididymal Epithelial Cells. PLoS ONE 10, e0135605

<sup>2</sup> Nixon, B., Stanger, S. J., Mihalas, B. P., Reilly, J. N., Anderson, A. L., Tyagi, S., Holt, J. E., and McLaughlin, E. A. (2015) The MicroRNA Signature of Mouse Spermatozoa Is Substantially Modified During Epididymal Maturation. Biol Reprod 93, 91











|                                                          |              |                      |                     |                    |       |       |        |       |
|----------------------------------------------------------|--------------|----------------------|---------------------|--------------------|-------|-------|--------|-------|
|                                                          | miR-3473b    | *                    | -                   | -                  | *     | *     | -      | -     |
|                                                          | miR-3473e    | *                    | -                   | -                  | *     | *     | -      | -     |
|                                                          | miR-3473f    | *                    | -                   | -                  | *     | *     | -      | -     |
| miR-3535                                                 | miR-3535     | *                    | -                   | -                  | *     | *     | -      | -     |
| miR-5099                                                 | miR-5099     | *                    | -                   | -                  | *     | *     | -      | -     |
| miR-5100                                                 | miR-5100     | *                    | -                   | -                  | *     | *     | -      | -     |
| miR-5119                                                 | miR-5119     | *                    | -                   | -                  | *     | *     | -      | -     |
| miR-5121                                                 | miR-5121     | *                    | -                   | -                  | *     | *     | -      | -     |
| miR-5126                                                 | miR-5126     | *                    | -                   | -                  | *     | *     | -      | -     |
| miR-5128                                                 | miR-5128     | *                    | -                   | -                  | *     | *     | -      | -     |
| miR-6238                                                 | miR-6238     | *                    | -                   | -                  | *     | *     | -      | -     |
| miR-6240                                                 | miR-6240     | *                    | -                   | -                  | *     | *     | -      | -     |
| miR-6412                                                 | miR-6412     | *                    | -                   | -                  | *     | *     | -      | -     |
| miR-6538                                                 | miR-6538     | *                    | -                   | -                  | *     | *     | -      | -     |
| miR-6937                                                 | miR-6937     | *                    | -                   | -                  | *     | *     | -      | -     |
| miR-7033                                                 | miR-7033     | *                    | -                   | -                  | *     | *     | -      | -     |
| miR-7087                                                 | miR-7087     | *                    | -                   | -                  | *     | *     | -      | -     |
| miRNA Family                                             | Mature miRNA | Total Epididymosomes |                     |                    | Mouse |       | Bovine |       |
|                                                          |              | Mouse                | Bovine <sup>1</sup> | Human <sup>2</sup> | Caput | Cauda | Caput  | Cauda |
| miRNAs represented only in bovine epididymosome datasets |              |                      |                     |                    |       |       |        |       |
| miR-92                                                   | miR-92       | -                    | +                   | -                  | -     | -     | +      | +     |
| miR-145                                                  | miR-145      | -                    | +                   | -                  | -     | -     | +      | +     |
| miR-106                                                  | miR-106      | -                    | +                   | -                  | -     | -     | +      | +     |
| miRNA Family                                             | Mature miRNA | Total Epididymosomes |                     |                    | Mouse |       | Bovine |       |
|                                                          |              | Mouse                | Bovine <sup>1</sup> | Human <sup>2</sup> | Caput | Cauda | Caput  | Cauda |
| miRNAs represented only in human epididymosome datasets  |              |                      |                     |                    |       |       |        |       |
| miR-18                                                   | miR-18b      | -                    | -                   | +                  | -     | -     | -      | -     |
| miR-28                                                   | miR-28       | -                    | -                   | +                  | -     | -     | -      | -     |
| miR-106                                                  | miR-106a     | -                    | -                   | +                  | -     | -     | -      | -     |
| miR-197                                                  | miR-197      | -                    | -                   | +                  | -     | -     | -      | -     |
| miR-198                                                  | miR-198      | -                    | -                   | +                  | -     | -     | -      | -     |
| miR-202                                                  | miR-202      | -                    | -                   | +                  | -     | -     | -      | -     |
| miR-297                                                  | miR-297      | -                    | -                   | +                  | -     | -     | -      | -     |
| miR-320                                                  | miR-320a     | -                    | -                   | +                  | -     | -     | -      | -     |
|                                                          | miR-320b     | -                    | -                   | +                  | -     | -     | -      | -     |
|                                                          | miR-320c     | -                    | -                   | +                  | -     | -     | -      | -     |
|                                                          | miR-320d     | -                    | -                   | +                  | -     | -     | -      | -     |
|                                                          | miR-320e     | -                    | -                   | +                  | -     | -     | -      | -     |
| miR-346                                                  | miR-346      | -                    | -                   | +                  | -     | -     | -      | -     |
| miR-363                                                  | miR-363      | -                    | -                   | +                  | -     | -     | -      | -     |
| miR-378                                                  | miR-378      | -                    | -                   | +                  | -     | -     | -      | -     |
| miR-382                                                  | miR-382      | -                    | -                   | +                  | -     | -     | -      | -     |
| miR-432                                                  | miR-432      | -                    | -                   | +                  | -     | -     | -      | -     |
| miR-449                                                  | miR-449b     | -                    | -                   | +                  | -     | -     | -      | -     |
| miR-483                                                  | miR-483      | -                    | -                   | +                  | -     | -     | -      | -     |
| miR-487                                                  | miR-487b     | -                    | -                   | +                  | -     | -     | -      | -     |
| miR-491                                                  | miR-491      | -                    | -                   | +                  | -     | -     | -      | -     |
| miR-494                                                  | miR-494      | -                    | -                   | +                  | -     | -     | -      | -     |
| miR-502                                                  | miR-502      | -                    | -                   | +                  | -     | -     | -      | -     |
| miR-505                                                  | miR-505      | -                    | -                   | +                  | -     | -     | -      | -     |
| miR-508                                                  | miR-508      | -                    | -                   | +                  | -     | -     | -      | -     |
| miR-509                                                  | miR-509      | -                    | -                   | +                  | -     | -     | -      | -     |
| miR-510                                                  | miR-510      | -                    | -                   | +                  | -     | -     | -      | -     |
| miR-513                                                  | miR-513a     | -                    | -                   | +                  | -     | -     | -      | -     |
| miR-514                                                  | miR-514b     | -                    | -                   | +                  | -     | -     | -      | -     |
| miR-550                                                  | miR-550      | -                    | -                   | +                  | -     | -     | -      | -     |
| miR-551                                                  | miR-551b     | -                    | -                   | +                  | -     | -     | -      | -     |
| miR-572                                                  | miR-572      | -                    | -                   | +                  | -     | -     | -      | -     |
| miR-575                                                  | miR-575      | -                    | -                   | +                  | -     | -     | -      | -     |
| miR-595                                                  | miR-595      | -                    | -                   | +                  | -     | -     | -      | -     |
| miR-602                                                  | miR-602      | -                    | -                   | +                  | -     | -     | -      | -     |
| miR-625                                                  | miR-625      | -                    | -                   | +                  | -     | -     | -      | -     |
| miR-628                                                  | miR-628      | -                    | -                   | +                  | -     | -     | -      | -     |
| miR-629                                                  | miR-629      | -                    | -                   | +                  | -     | -     | -      | -     |
| miR-638                                                  | miR-638      | -                    | -                   | +                  | -     | -     | -      | -     |
| miR-639                                                  | miR-639      | -                    | -                   | +                  | -     | -     | -      | -     |
| miR-658                                                  | miR-658      | -                    | -                   | +                  | -     | -     | -      | -     |
| miR-659                                                  | miR-659      | -                    | -                   | +                  | -     | -     | -      | -     |
| miR-663                                                  | miR-663      | -                    | -                   | +                  | -     | -     | -      | -     |
| miR-665                                                  | miR-665      | -                    | -                   | +                  | -     | -     | -      | -     |
| miR-675                                                  | miR-675      | -                    | -                   | +                  | -     | -     | -      | -     |
| miR-720                                                  | miR-720      | -                    | -                   | +                  | -     | -     | -      | -     |
| miR-762                                                  | miR-762      | -                    | -                   | +                  | -     | -     | -      | -     |
| miR-769                                                  | miR-769      | -                    | -                   | +                  | -     | -     | -      | -     |
| miR-877                                                  | miR-877      | -                    | -                   | +                  | -     | -     | -      | -     |
| miR-885                                                  | miR-885      | -                    | -                   | +                  | -     | -     | -      | -     |
| miR-886                                                  | miR-886      | -                    | -                   | +                  | -     | -     | -      | -     |
| miR-888                                                  | miR-888      | -                    | -                   | +                  | -     | -     | -      | -     |
| miR-890                                                  | miR-890      | -                    | -                   | +                  | -     | -     | -      | -     |
| miR-891                                                  | miR-891a     | -                    | -                   | +                  | -     | -     | -      | -     |
| miR-891                                                  | miR-891b     | -                    | -                   | +                  | -     | -     | -      | -     |
| miR-892                                                  | miR-892a     | -                    | -                   | +                  | -     | -     | -      | -     |
|                                                          | miR-892b     | -                    | -                   | +                  | -     | -     | -      | -     |
| miR-933                                                  | miR-933      | -                    | -                   | +                  | -     | -     | -      | -     |
| miR-939                                                  | miR-939      | -                    | -                   | +                  | -     | -     | -      | -     |
| miR-940                                                  | miR-940      | -                    | -                   | +                  | -     | -     | -      | -     |
| miR-1180                                                 | miR-1180     | -                    | -                   | +                  | -     | -     | -      | -     |
| miR-1202                                                 | miR-1202     | -                    | -                   | +                  | -     | -     | -      | -     |
| miR-1207                                                 | miR-1207     | -                    | -                   | +                  | -     | -     | -      | -     |
| miR-1224                                                 | miR-1224     | -                    | -                   | +                  | -     | -     | -      | -     |
| miR-1225                                                 | miR-1225     | -                    | -                   | +                  | -     | -     | -      | -     |
| miR-1226                                                 | miR-1226     | -                    | -                   | +                  | -     | -     | -      | -     |
| miR-1228                                                 | miR-1228     | -                    | -                   | +                  | -     | -     | -      | -     |
| miR-1231                                                 | miR-1231     | -                    | -                   | +                  | -     | -     | -      | -     |
| miR-1246                                                 | miR-1246     | -                    | -                   | +                  | -     | -     | -      | -     |
| miR-1254                                                 | miR-1254     | -                    | -                   | +                  | -     | -     | -      | -     |
| miR-1260                                                 | miR-1260     | -                    | -                   | +                  | -     | -     | -      | -     |
|                                                          | miR-1260b    | -                    | -                   | +                  | -     | -     | -      | -     |
| miR-1268                                                 | miR-1268     | -                    | -                   | +                  | -     | -     | -      | -     |
| miR-1274                                                 | miR-1274b    | -                    | -                   | +                  | -     | -     | -      | -     |
| miR-1275                                                 | miR-1275     | -                    | -                   | +                  | -     | -     | -      | -     |
| miR-1280                                                 | miR-1280     | -                    | -                   | +                  | -     | -     | -      | -     |
| miR-1281                                                 | miR-1281     | -                    | -                   | +                  | -     | -     | -      | -     |
| miR-1292                                                 | miR-1292     | -                    | -                   | +                  | -     | -     | -      | -     |
| miR-1299                                                 | miR-1299     | -                    | -                   | +                  | -     | -     | -      | -     |
| miR-1301                                                 | miR-1301     | -                    | -                   | +                  | -     | -     | -      | -     |
| miR-1307                                                 | miR-1307     | -                    | -                   | +                  | -     | -     | -      | -     |
| miR-1308                                                 | miR-1308     | -                    | -                   | +                  | -     | -     | -      | -     |
| miR-1469                                                 | miR-1469     | -                    | -                   | +                  | -     | -     | -      | -     |
| miR-1825                                                 | miR-1825     | -                    | -                   | +                  | -     | -     | -      | -     |
| miR-1826                                                 | miR-1826     | -                    | -                   | +                  | -     | -     | -      | -     |
| miR-1908                                                 | miR-1908     | -                    | -                   | +                  | -     | -     | -      | -     |
| miR-1909                                                 | miR-1909     | -                    | -                   | +                  | -     | -     | -      | -     |
| miR-1910                                                 | miR-1910     | -                    | -                   | +                  | -     | -     | -      | -     |
| miR-1914                                                 | miR-1914     | -                    | -                   | +                  | -     | -     | -      | -     |
| miR-1915                                                 | miR-1915     | -                    | -                   | +                  | -     | -     | -      | -     |
| miR-1975                                                 | miR-1975     | -                    | -                   | +                  | -     | -     | -      | -     |
| miR-1979                                                 | miR-1979     | -                    | -                   | +                  | -     | -     | -      | -     |
| miR-2110                                                 | miR-2110     | -                    | -                   | +                  | -     | -     | -      | -     |
| miR-2277                                                 | miR-2277     | -                    | -                   | +                  | -     | -     | -      | -     |
| miR-2861                                                 | miR-2861     | -                    | -                   | +                  | -     | -     | -      | -     |
| miR-3065                                                 | miR-3065     | -                    | -                   | +                  | -     | -     | -      | -     |
| miR-3124                                                 | miR-3124     | -                    | -                   | +                  | -     | -     | -      | -     |
| miR-3128                                                 | miR-3128     | -                    | -                   | +                  | -     | -     | -      | -     |
| miR-3131                                                 | miR-3131     | -                    | -                   | +                  | -     | -     | -      | -     |
| miR-3141                                                 | miR-3141     | -                    | -                   | +                  | -     | -     | -      | -     |
| miR-3147                                                 | miR-3147     | -                    | -                   | +                  | -     | -     | -      | -     |
| miR-3148                                                 | miR-3148     | -                    | -                   | +                  | -     | -     | -      | -     |
| miR-3149                                                 | miR-3149     | -                    | -                   | +                  | -     | -     | -      | -     |
| miR-3162                                                 | miR-3162     | -                    | -                   | +                  | -     | -     | -      | -     |
| miR-3175                                                 | miR-3175     | -                    | -                   | +                  | -     | -     | -      | -     |
| miR-3178                                                 | miR-3178     | -                    | -                   | +                  | -     | -     | -      | -     |
| miR-3180                                                 | miR-3180     | -                    | -                   | +                  | -     | -     | -      | -     |
| miR-3185                                                 | miR-3185     | -                    | -                   | +                  | -     | -     | -      | -     |
| miR-3187                                                 | miR-3187     | -                    | -                   | +                  | -     | -     | -      | -     |

|          |          |   |   |   |   |   |   |   |
|----------|----------|---|---|---|---|---|---|---|
| miR-3188 | miR-3188 | - | - | + | - | - | - | - |
| miR-3191 | miR-3191 | - | - | + | - | - | - | - |
| miR-3194 | miR-3194 | - | - | + | - | - | - | - |
| miR-3195 | miR-3195 | - | - | + | - | - | - | - |
| miR-3196 | miR-3196 | - | - | + | - | - | - | - |
| miR-3197 | miR-3197 | - | - | + | - | - | - | - |
| miR-3201 | miR-3201 | - | - | + | - | - | - | - |
| miR-4253 | miR-4253 | - | - | + | - | - | - | - |
| miR-4259 | miR-4259 | - | - | + | - | - | - | - |
| miR-4270 | miR-4270 | - | - | + | - | - | - | - |
| miR-4271 | miR-4271 | - | - | + | - | - | - | - |
| miR-4281 | miR-4281 | - | - | + | - | - | - | - |
| miR-4286 | miR-4286 | - | - | + | - | - | - | - |
| miR-4298 | miR-4298 | - | - | + | - | - | - | - |
| miR-4299 | miR-4299 | - | - | + | - | - | - | - |
| miR-4306 | miR-4306 | - | - | + | - | - | - | - |
| miR-4322 | miR-4322 | - | - | + | - | - | - | - |

1. Belleanne, C., Calvo, E., Caballero, J., and Sullivan, R. (2013) Epididymosomes convey different repertoires of microRNAs throughout the bovine epididymis. *Biol Reprod* 89, 30

1. Belleanne, C., Legare, C., Calvo, E., Thimon, V., and Sullivan, R. (2013) microRNA signature is altered in both human epididymis and seminal microvesicles following vasectomy. *Hum Reprod* 28, 1455-1467
